# Supplementary material for: Glycan heterogeneity as a cause of the persistent fraction in HIV-1 neutralization
Source: PubMed Central journal article supplement (PMC10635575; doi:10.1371/journal.ppat.1011601), 2023-10-30
Supplement: ppat.1011601.s001.pdf [file ppat.1011601.s001.pdf]

## S1 Table. Single-cycle kinetics (SCK)

### Validation of Langmuir modeling<sup>a</sup>

| Fab     | Affinity purification | $T(k_{on})$                  | $T(k_{off})$                 | $\chi^2$                        | $k_t$<br>(RU/Ms)                               | $T(k_t)$                                       | $U$            |
|---------|-----------------------|------------------------------|------------------------------|---------------------------------|------------------------------------------------|------------------------------------------------|----------------|
| 3BNC117 | 2G12<br>(n=2)         | $1.5 \cdot 10^3$<br>$\pm 50$ | $7.7 \cdot 10^2$<br>$\pm 40$ | 0.10<br>$\pm 3.5 \cdot 10^{-4}$ | $1.0 \cdot 10^{21}$<br>$\pm 1.0 \cdot 10^{21}$ | $1.1 \cdot 10^{-2}$<br>$\pm 1.1 \cdot 10^{-2}$ | 1.0<br>$\pm 0$ |

<sup>a</sup> Tabulated values are means  $\pm$  S.E.M of 'n' independent replicates. The data complement **Figure 10**.

### Validation of Heterogeneous-ligand modeling<sup>a</sup>

| Fab    | Affinity purification | $T(k_{on1})$                             | $T(k_{off1})$                | $T(k_{on2})$                             | $T(k_{off2})$                | $\chi^2$                                       | $k_t$<br>(RU/Ms)                               | $T(k_t)$                                       |
|--------|-----------------------|------------------------------------------|------------------------------|------------------------------------------|------------------------------|------------------------------------------------|------------------------------------------------|------------------------------------------------|
| PGT151 | 2G12<br>(n=2)         | $3.4 \cdot 10^2$<br>$\pm 1.9 \cdot 10^2$ | $2.9 \cdot 10^2$<br>$\pm 70$ | $3.0 \cdot 10^2$<br>$\pm 1.3 \cdot 10^2$ | $2.7 \cdot 10^2$<br>$\pm 0$  | $5.9 \cdot 10^{-2}$<br>$\pm 1.4 \cdot 10^{-2}$ | $2.6 \cdot 10^{17}$<br>$\pm 1.1 \cdot 10^{17}$ | $4.4 \cdot 10^{-5}$<br>$\pm 2.4 \cdot 10^{-5}$ |
|        | PGT151<br>(n=4)       | $3.1 \cdot 10^2$<br>$\pm 1.2 \cdot 10^2$ | $2.4 \cdot 10^2$<br>$\pm 43$ | $2.9 \cdot 10^2$<br>$\pm 1.1 \cdot 10^2$ | $2.3 \cdot 10^2$<br>$\pm 45$ | 0.18<br>$\pm 6.0 \cdot 10^{-3}$                | $3.6 \cdot 10^{19}$<br>$\pm 3.5 \cdot 10^{19}$ | $2.1 \cdot 10^{-4}$<br>$\pm 1.7 \cdot 10^{-4}$ |

<sup>a</sup> Tabulated values are means  $\pm$  S.E.M of 'n' independent replicates. The data complement **Figure 11**.
