# Supplementary material for: Glycan heterogeneity as a cause of the persistent fraction in HIV-1 neutralization
Source: PubMed Central journal article supplement (PMC10635575; doi:10.1371/journal.ppat.1011601), 2023-10-30
Supplement: ppat.1011601.s002.pdf [file ppat.1011601.s002.pdf]

## S2 Table. Multi-cycle Kinetics (MCK)

### Validation of Langmuir modeling <sup>a</sup>

| Fab     | Affinity purification | $T(k_{on})$                  | $T(k_{off})$                 | $\chi^2$                                       | $k_t$<br>(RU/Ms)                               | $T(k_t)$                                       | $U$            |
|---------|-----------------------|------------------------------|------------------------------|------------------------------------------------|------------------------------------------------|------------------------------------------------|----------------|
| 3BNC117 | 2G12<br>(n=2)         | $2.8 \cdot 10^3$<br>$\pm 50$ | $3.0 \cdot 10^2$<br>$\pm 20$ | $6.0 \cdot 10^{-2}$<br>$\pm 5.0 \cdot 10^{-4}$ | $6.2 \cdot 10^{20}$<br>$\pm 6.2 \cdot 10^{20}$ | $4.7 \cdot 10^{-2}$<br>$\pm 4.7 \cdot 10^{-2}$ | 3.0<br>$\pm 0$ |

<sup>a</sup> Tabulated values are means  $\pm$  S.E.M of 'n' independent replicates. The data complement **SI Figure 4**.

### Validation of Heterogeneous-ligand modeling <sup>a</sup>

| Fab    | Affinity purification | $T(k_{on1})$                  | $T(k_{off1})$                | $T(k_{on2})$                 | $T(k_{off2})$                | $\chi^2$                                       | $k_t$<br>(RU/Ms)                               | $T(k_t)$                                       |
|--------|-----------------------|-------------------------------|------------------------------|------------------------------|------------------------------|------------------------------------------------|------------------------------------------------|------------------------------------------------|
| PGT151 | 2G12<br>(n=2)         | $7.1 \cdot 10^2$<br>$\pm 5.0$ | $1.0 \cdot 10^2$<br>$\pm 70$ | $2.8 \cdot 10^2$<br>$\pm 65$ | $3.4 \cdot 10^2$<br>$\pm 65$ | $2.3 \cdot 10^{-2}$<br>$\pm 4.1 \cdot 10^{-3}$ | $3.9 \cdot 10^{21}$<br>$\pm 3.5 \cdot 10^{20}$ | $8.1 \cdot 10^{-4}$<br>$\pm 4.0 \cdot 10^{-4}$ |

<sup>a</sup> Tabulated values are means  $\pm$  S.E.M of 'n' independent replicates. The data complement **SI Figure 4**.
