# Supplementary material for: Glycan heterogeneity as a cause of the persistent fraction in HIV-1 neutralization
Source: PubMed Central journal article supplement (PMC10635575; doi:10.1371/journal.ppat.1011601), 2023-10-30
Supplement: ppat.1011601.s003.pdf [file ppat.1011601.s003.pdf]

**S3 Table. Cryo-EM data collection, processing, and validation**

| Map                                            | CZA97.012 SOSIP + 3BNC117 Fab |
|------------------------------------------------|-------------------------------|
| EMDB                                           | EMD-40088                     |
| <b>Data collection</b>                         |                               |
| Microscope                                     | Thermo Fisher Titan Krios     |
| Voltage (kV)                                   | 300                           |
| Detector                                       | Gatan K2 Summit               |
| Recording mode                                 | Counting                      |
| Nominal magnification                          | 22,500                        |
| Movie micrograph pixel size (Å)                | 1.31                          |
| Dose rate (e <sup>-</sup> /[(camera pixel)*s]) | 10.0                          |
| Number of frames per movie micrograph          | 50                            |
| Frame exposure time (ms)                       | 200                           |
| Movie micrograph exposure time (s)             | 10                            |
| Total dose (e <sup>-</sup> /Å <sup>2</sup> )   | 58                            |
| Defocus range (µm)                             | -1.0 to -2.7                  |
| <b>EM data processing</b>                      |                               |
| Number of movie micrographs                    | 1,142                         |
| Number of molecular projection images in map   | 79,261                        |
| Symmetry                                       | C3                            |
| Map resolution (FSC 0.143; Å)                  | 3.4                           |
| Map sharpening B-factor (Å <sup>2</sup> )      | -126                          |
| <b>Structure Building and Validation</b>       |                               |
| <i>Number of atoms in deposited model</i>      |                               |
| SOSIP gp120                                    | 10,707                        |
| SOSIP gp41                                     | 2,925                         |
| Fab Fv                                         | 5,349                         |
| glycans                                        | 1,677                         |
| MolProbity score                               | 1.00                          |
| Clashscore                                     | 1.63                          |
| Map correlation coefficient                    | 0.83                          |
| d FSC model (0.5)                              | 3.6                           |
| EMRinger score                                 | 2.82                          |
| <i>RMSD from ideal</i>                         |                               |
| Bond length (Å)                                | 0.006                         |
| Bond angles (°)                                | 0.946                         |
| <i>Ramachandran plot</i>                       |                               |
| Favored (%)                                    | 97.57                         |
| Allowed (%)                                    | 2.43                          |
| Outliers (%)                                   | 0.00                          |
| Side chain rotamer outliers (%)                | 0.29                          |
| Cβ outliers (%)                                | 0.00                          |
| PDB                                            | 8gje                          |
