# Supplementary material for: Glycan heterogeneity as a cause of the persistent fraction in HIV-1 neutralization
Source: PubMed Central journal article supplement (PMC10635575; doi:10.1371/journal.ppat.1011601), 2023-10-30
Supplement: ppat.1011601.s004.pdf [file ppat.1011601.s004.pdf]

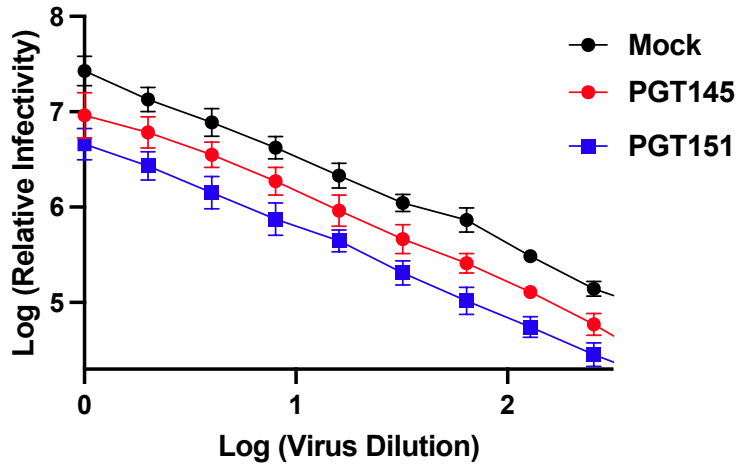

**S1 Figure. The residual infectivity in neutralization of PV at varied dose.** The log<sub>10</sub> of the relative remaining infectivity after neutralization by bNAb at a fixed concentration (50 µg/ml) is plotted as a function of the log<sub>10</sub> of varied inoculum-dilution factor.
