# Supplementary material for: Glycan heterogeneity as a cause of the persistent fraction in HIV-1 neutralization
Source: PubMed Central journal article supplement (PMC10635575; doi:10.1371/journal.ppat.1011601), 2023-10-30
Supplement: ppat.1011601.s005.pdf [file ppat.1011601.s005.pdf]

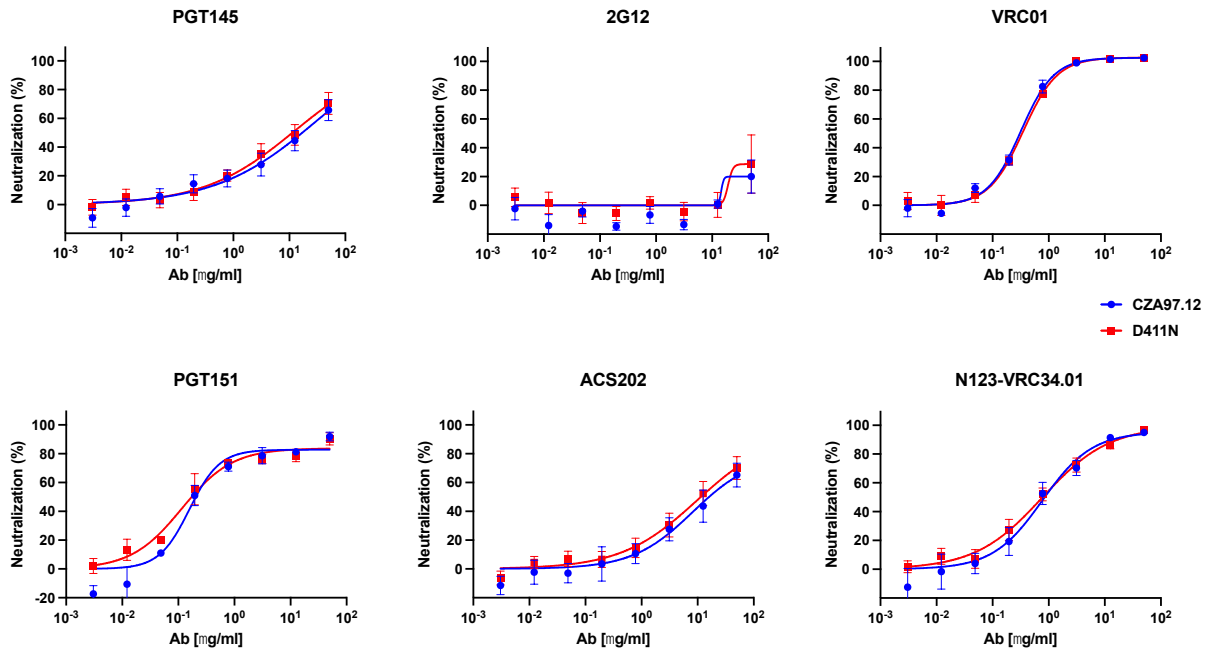

**S2 Figure. Neutralization of CZA97.012 parental and D411N-mutant PV.** Neutralization of the respective PV (see legend) by the indicated bNAbs is shown. The diagrams show a sigmoid curve fitted to % neutralization as a function of bNAbs concentration ( $\mu\text{g/ml}$ ). The data points are means of 2-9 replicates  $\pm$  s.e.m.
