# Supplementary material for: Glycan heterogeneity as a cause of the persistent fraction in HIV-1 neutralization
Source: PubMed Central journal article supplement (PMC10635575; doi:10.1371/journal.ppat.1011601), 2023-10-30
Supplement: ppat.1011601.s006.pdf [file ppat.1011601.s006.pdf]

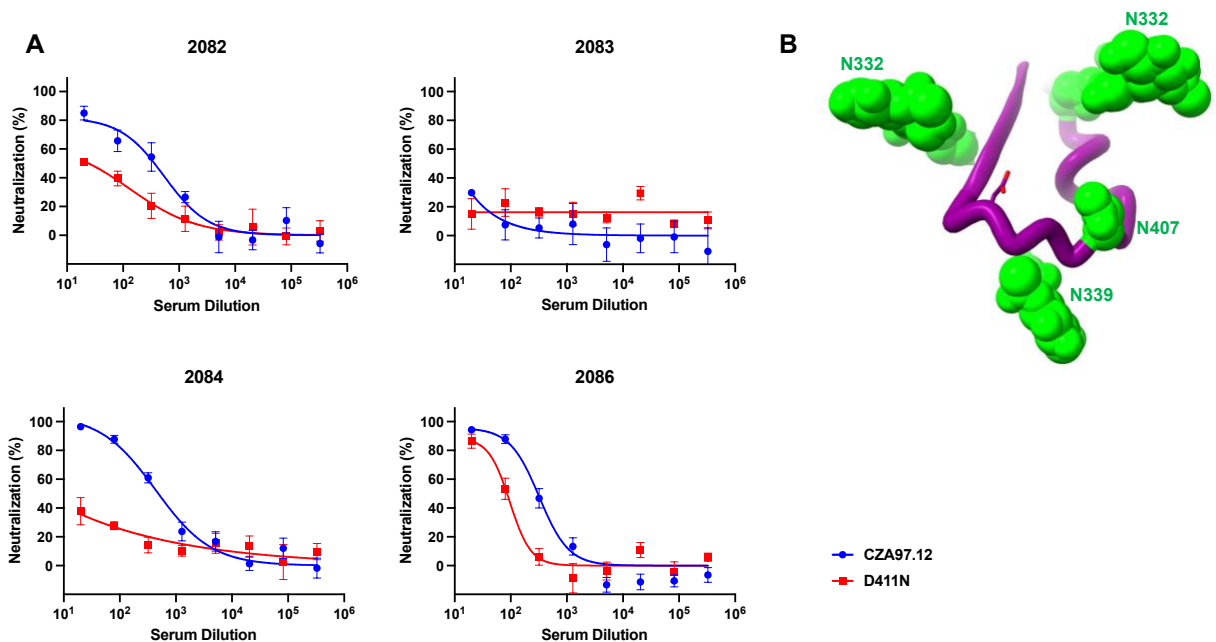

**S3 Figure. The mapping of autologous NAb epitopes in sera from rabbits immunized with CZA97.012 SOSIP.664. A.** The immunization sequence (70) and the D411N mutant have been described (69). Neutralization of CZA97.012 parental and D411N-mutant PV by rabbit sera was analyzed. The diagrams show a sigmoid curve fitted to % neutralization as a function of the serum dilution factor. The data points are means of 5-11 replicates  $\pm$  s.e.m. **B.** A cryo-EM model of the CZA97.012 SOSIP.664 V4- $\beta$ 19 transition (backbone in purple) is shown with N-linked glycans near D411 (side-chain as red stick) depicted with carbohydrate residues as green spheres.
