# Supplementary material for: Glycan heterogeneity as a cause of the persistent fraction in HIV-1 neutralization
Source: PubMed Central journal article supplement (PMC10635575; doi:10.1371/journal.ppat.1011601), 2023-10-30
Supplement: ppat.1011601.s008.pdf [file ppat.1011601.s008.pdf]

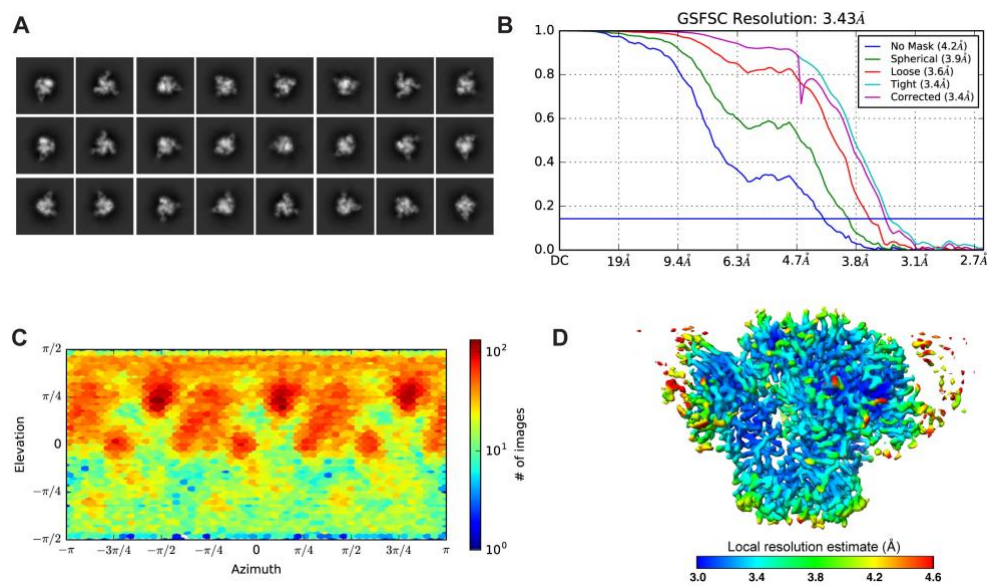

**S5 Figure. Cryo-EM data processing.** **A.** Representative 2D-class averages are shown. **B.** The diagram shows Fourier-shell correlation **C.** The angular distribution is given as depicted in the color code. **D.** Local resolution estimate (color-coded key) is shown for CZA97.012 SOSIP.664+3BNC117.
